# Supplementary material for: Anion-Controlled Architecture and Photochromism of Naphthalene Diimide-Based Coordination Polymers
Source: MDPI journal article supplement (doi:10.3390/polym10020165), 2018-02-08
Supplement: s1 [file s1]

Electronic Supplementary Information for

## **Anion-controlled architecture and photochromism of naphthalene diimide-based coordination polymers**

Jian-Jun Liu <sup>1,\*</sup>, Shu-Biao Xia <sup>1</sup>, Yu-Lian Duan <sup>1</sup>, Teng Liu <sup>1</sup>, Fei-Xiang Cheng <sup>1</sup>, Cheng-Ke Sun <sup>1</sup>

*1 Center for Yunnan-Guizhou Plateau Chemical Functional Materials and Pollution Control, Qujing Normal University, Qujing 655011, China*

*E-mail: jianjun\_liu@mail.qjnu.edu.cn*

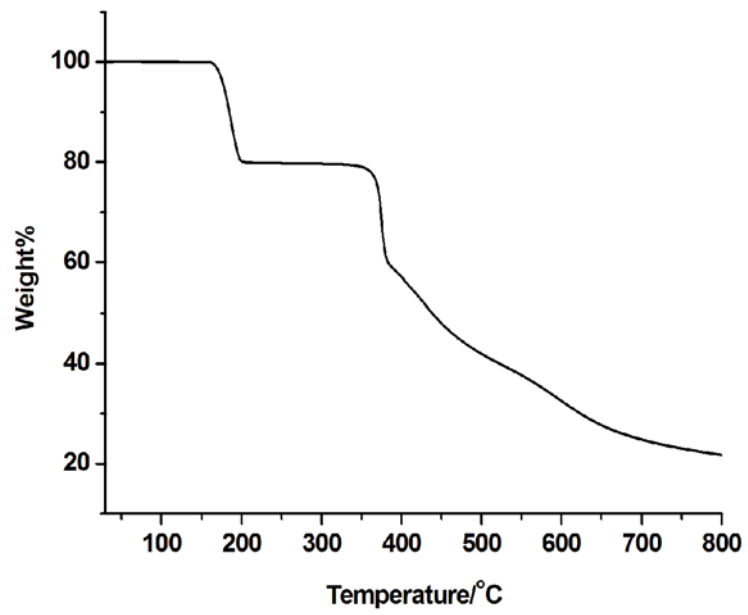

Figure S1. Thermogravimetric (TG) trace of **1**.

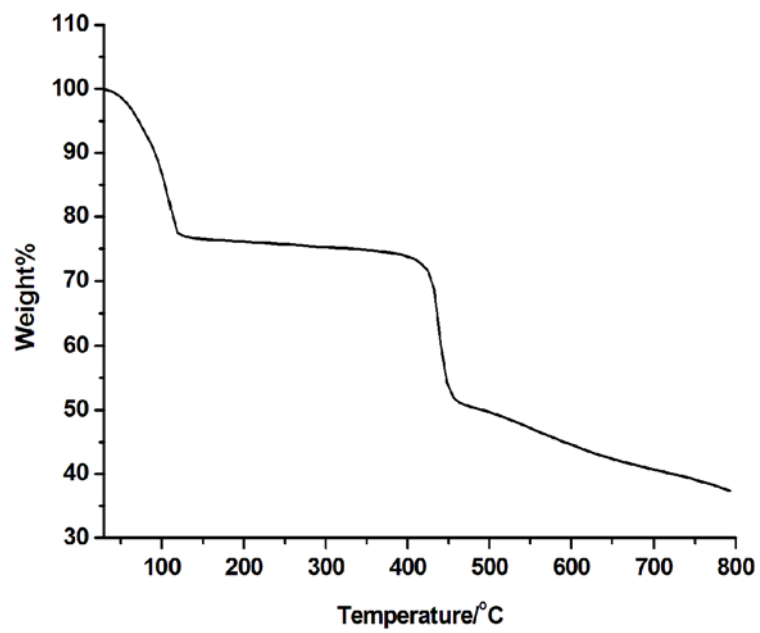

Figure S2. Thermogravimetric (TG) trace of **2**.

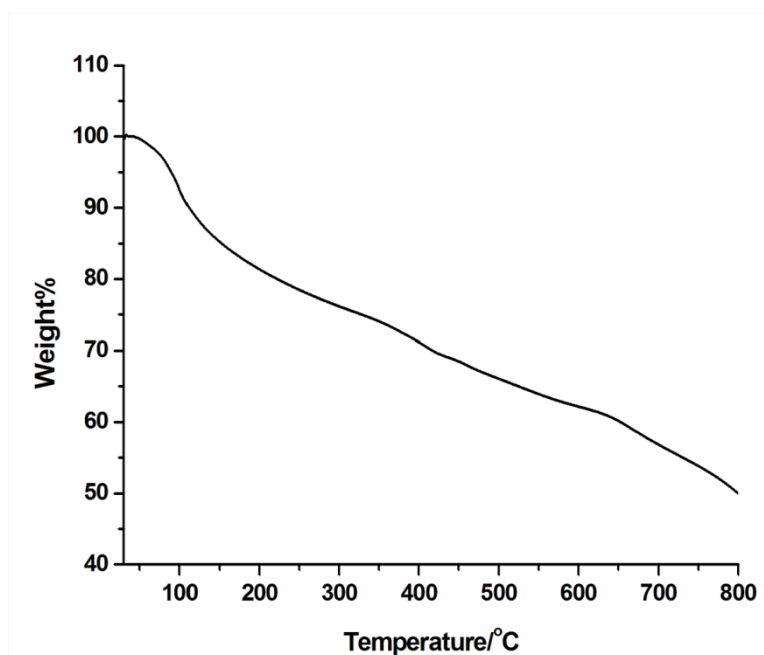

Figure S3. Thermogravimetric (TG) trace of **3**.

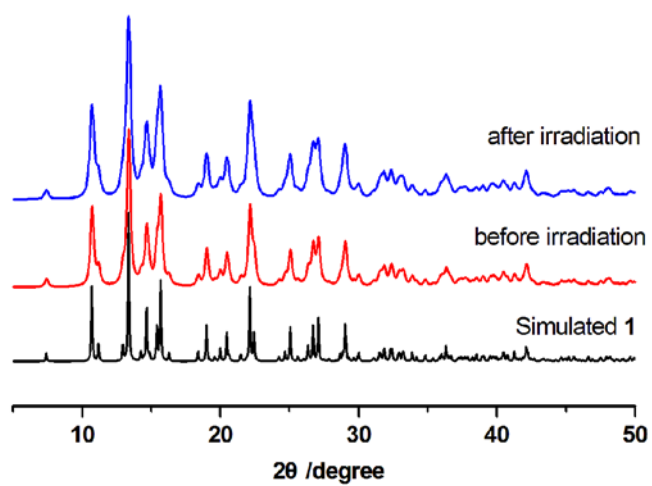

Figure S4. The PXRD patterns for compound **1**.

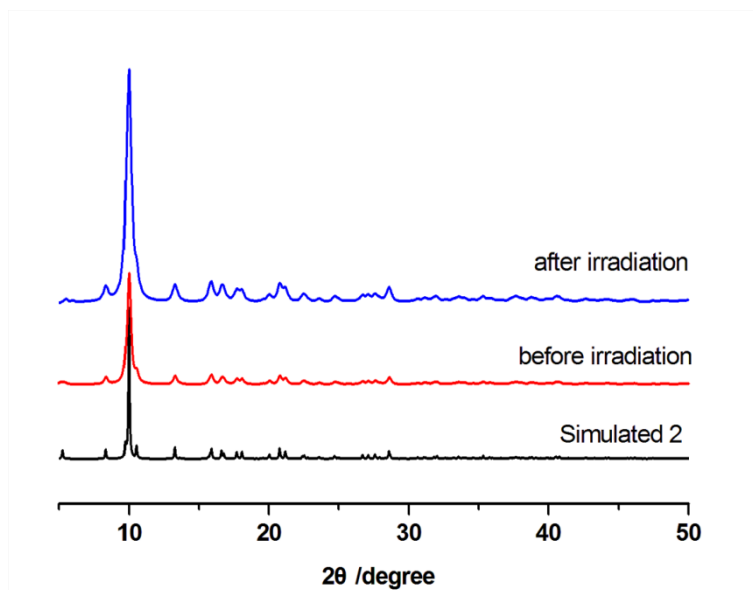

Figure S5. The PXR D patterns for compound **2**.

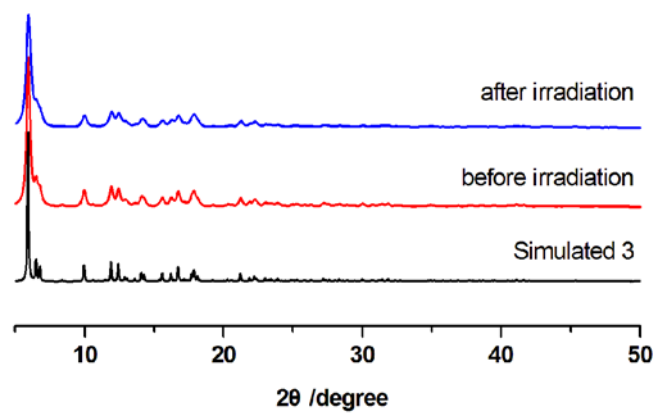

Figure S6. The PXR D patterns for compound **3**.

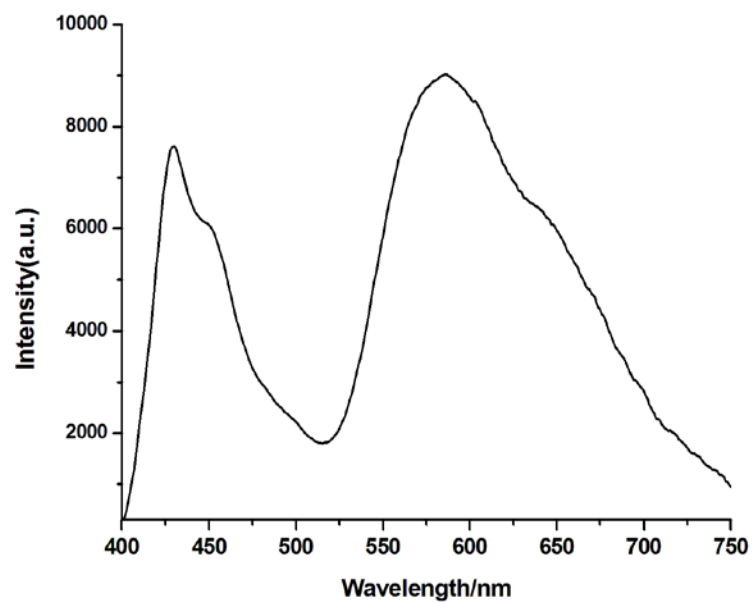

Figure S7. The emission spectra of DPNDI in solid state (excited at 350 nm).
